# Supplementary material for: Measuring Belief in Conspiracy Theories Across Borders: A Cross- National Psychometric Approach
Source: Research Square preprint supplement (doi:10.21203/rs.3.rs-7138689/v1), 2025-10-03
Supplement: Supplementary file 1 [file 97447c685271c236eb0b489f.pdf]

## **Supplemental material**

|                                                                                        |           |
|----------------------------------------------------------------------------------------|-----------|
| <b>Supplemental material 1 - Description of the 60 conspiracy theories</b>             | <b>2</b>  |
| Table SM1.1. Question wording of the 60 conspiracy theories                            | 5         |
| Table SM1.2. Descriptive statistics of the 60 conspiracy theories                      | 10        |
| <b>Supplemental material 2 - Principal component analysis</b>                          | <b>11</b> |
| Table SM2.1. PCA                                                                       | 11        |
| Table SM2.2. Cronbach's Alpha                                                          | 11        |
| <b>Supplemental material 3 - Comparative conspiracy beliefs and mentality scales</b>   | <b>12</b> |
| Figure SM3.1. Kernel density distributions of the scales                               | 12        |
| <b>Supplemental material 4 - Fit statistics for the models</b>                         | <b>13</b> |
| Table SM4.1. Fit statistics for all the SEM models                                     | 14        |
| <b>Supplemental material 5 - Additional check - invariance for the mentality scale</b> | <b>15</b> |
| Table SM5.1. Configural, metric, and scalar fit for the multigroup model - GCB-5 scale | 15        |
| <b>Supplemental material 6 - Full item wordings employed in the validity analysis</b>  | <b>16</b> |
| Table SM6.1. Comparative variables                                                     | 18        |
| Table SM6.2. US-specific variables                                                     | 21        |

## Supplemental material 1 - Description of the 60 conspiracy theories

| Labels            | Questions                                                                                                                              |
|-------------------|----------------------------------------------------------------------------------------------------------------------------------------|
| rad_poison        | Governments and the nuclear industry are intentionally poisoning the public with radioactive food.                                     |
| aids_cia          | AIDS was created by the CIA and deliberately spread by the WHO via polio inoculations in Africa to try to reduce the world population. |
| aids_cover        | Scientists and politicians are trying to cover up that AIDS is not caused by HIV infection.                                            |
| vaccine_autism    | Scientists and politicians are trying to cover up that mercury in vaccines is causing autism.                                          |
| bee_dieoff        | The mass die-offs of honeybees are attributable to corporations' desire to control the food supply.                                    |
| cancer_cure       | The cure for cancer actually exists, but is being suppressed by the government and corporations.                                       |
| covid_5g          | The 2020 Coronavirus pandemic has been triggered by 5G antennas.                                                                       |
| elf_mindcontrol   | The United States Department of Defense (DOD) is experimenting with ELF (Extremely Low Frequency) devices to control people's minds.   |
| covid_china       | The Chinese government deliberately released the COVID-19.                                                                             |
| earthquake_bomb   | Scientists have developed a secret earthquake bomb capable of causing incredible devastation.                                          |
| moon_hoax         | The lunar landing was a hoax and was staged in a movie set.                                                                            |
| climate_hoax      | Global warming is a hoax created by the UN and politically funded environmentalists.                                                   |
| earth_meltdown    | The Earth is in meltdown and the scientists are hiding this fact.                                                                      |
| hollow_earth      | The Earth is hollow, with a hole to the underworld located in the Arctic regions, protected by the World's superpowers.                |
| flat_earth        | NASA and other agencies are denying the fact that the earth is actually flat, with an army guarding the ice wall around the outside.   |
| cold_fusion_cover | The scientific community, politicians and oil industry are trying to cover up cold fusion.                                             |
| ufo_cover         | The United States is hiding UFO wreckage at various secret bases.                                                                      |

|                      |                                                                                                                                                                                                                          |
|----------------------|--------------------------------------------------------------------------------------------------------------------------------------------------------------------------------------------------------------------------|
| stargate_iraq        | The US government is operating a Stargate program and the Iraq War may have been caused because Saddam Hussein had one.                                                                                                  |
| alien_cover          | Ample evidence of alien life and civilization exists in our solar system, but is covered up by NASA.                                                                                                                     |
| evolution_false      | Scientists are trying to impose the false theories of evolution and the big bang on the public.                                                                                                                          |
| cern_hell            | In the CERN laboratory scientists are using the LHC (the biggest particles accelerator in the World) to open a portal to Hell.                                                                                           |
| chemtrails           | The vaporous contrails left by commercial jets flying through cold air pockets are actually chemtrails which disperse harmful chemical-biological agents.                                                                |
| 911_gov              | 9/11 was staged by the United States government.                                                                                                                                                                         |
| 911_energy_weapon    | 9/11 was contrived by a directed-energy weapon that 'dustified' at least the top 80% of each tower.                                                                                                                      |
| wtc7_det             | World Trade Center Building 7 was purposely detonated.                                                                                                                                                                   |
| swineflu_terror      | The 2009 swine flu outbreak was a terrorist attack.                                                                                                                                                                      |
| hebdo_staged         | The assassination of eight journalists at Charlie Hebdo in January 2015 was staged by the French government as a pretext for a crack-down on the Muslim population.                                                      |
| paris_bomb_staged    | The November 2015 Paris bombings were staged by the French government as a pretext for a crack-down on the Muslim population.                                                                                            |
| 911_forewarned       | The US government knew about the 9/11 attacks in advance. And let them happen.                                                                                                                                           |
| epstein_murder       | Jeffrey Epstein, the controversial American millionaire, did not commit suicide but was murdered                                                                                                                         |
| cia_conspiracy_label | In the 1960s, the CIA launched a campaign to discredit all conspiracy theorists by labeling them as irrational, aiming to conceal genuine government conspiracies and undermine dissenting views towards the government. |
| malcolm_x_gov        | Malcolm X was killed by government agents.                                                                                                                                                                               |
| liberty_lucifer      | The Statue of Liberty was built by French Freemasons to secretly represent Lucifer.                                                                                                                                      |
| hitler_alive         | Hitler did not commit suicide in 1945, and escaped to South America, where he lived until 1990, before dying at the age of 101.                                                                                          |
| nwo_group            | The whole world is run by a group trying to create some form of New World Order.                                                                                                                                         |

|                    |                                                                                                                                                                                                                       |
|--------------------|-----------------------------------------------------------------------------------------------------------------------------------------------------------------------------------------------------------------------|
| un_worldgov        | The United Nations secret aim is to eliminate and invade sovereign nations with 'peacekeeper' troops to create a World Government.                                                                                    |
| alqaeda_falseflag  | Al-Qaeda does not exist, and is a fictitious false enemy group created by the US Government in order to generate a fear campaign against a common enemy in order to justify numerous military actions by the US Army. |
| rothschild_control | The world is secretly ruled by the extremely powerful bankers Rothschild family.                                                                                                                                      |
| oil_tech_suppress  | Oil companies are deliberately suppressing more efficient and less polluting car technology.                                                                                                                          |
| central_banks      | The Central banks deliberately cause inflation and recessions.                                                                                                                                                        |
| monsanto_gmo       | Monsanto Company is secretly maneuvering to control the world's food supply using GMOs.                                                                                                                               |
| ebola_bigpharma    | The 2014 Ebola epidemic was deliberately contrived by Big Pharma in order to make profits from vaccines.                                                                                                              |
| jesus_fake         | The Roman Empire invented the figure of Jesus.                                                                                                                                                                        |
| muhammad_fake      | The Prophet Muhammad did not actually exist, but was invented after his alleged death in the 9th century.                                                                                                             |
| satanic_org        | A huge, international secret organization aims to commit the Satanic ritual abuse and murder of small children.                                                                                                       |
| masons_control     | The Masons secretly run the World.                                                                                                                                                                                    |
| jews_control       | The Jews secretly run the World.                                                                                                                                                                                      |
| monks_fake_history | Medieval monks faked most of classical literature and church history to promote an atheistic agenda.                                                                                                                  |
| elvis_alive        | Elvis Presley is not dead and is living under the name 'John Burrows'.                                                                                                                                                |
| marley_cia         | The reggae musician Bob Marley was assassinated by the CIA.                                                                                                                                                           |
| diana_queen        | The Queen of England ordered Princess Diana murdered by the British secret service because she was pregnant with Dodi Fayed's child and was about to convert to Islam.                                                |
| sports_staged      | Most, if not all professional sports are staged, and all the players are really B-grade actors.                                                                                                                       |
| goy_cabal          | A Yiddish secret society called Goy Cabal is using Wikipedia as part of a plan to dominate the information in the world.                                                                                              |

|                    |                                                                                                                                                                                                                              |
|--------------------|------------------------------------------------------------------------------------------------------------------------------------------------------------------------------------------------------------------------------|
| kubrick_illuminati | Director Stanley Kubrick was secretly a member of the Illuminati and devoted his entire career to hiding clues of their existence in his films, eventually getting assassinated after he crossed the line with his last film |
| titanic_olympic    | The Titanic did not sink and the ship that did sink was its sister ship the Olympic in an insurance scam.                                                                                                                    |
| prison_racism      | In an effort to control prison population, the US prison system creates and promotes racism.                                                                                                                                 |
| slavery_choice     | Slavery was a choice for Africans, and they chose to live in America for a better life.                                                                                                                                      |
| conspiracy_fake    | In order to divert the public's attention away from what is happening, some people generate credible conspiracy theories and then argue that any conspiracy theory is just a fictional delusion.                             |
| lefthand_secret    | A secret society of left-handed individuals controls the United States and the world. Five out of the last eight presidents were either left-handed or ambidextrous.                                                         |
| sharia_law_west    | Muslims are trying to impose Sharia law on the West.                                                                                                                                                                         |

---

*Table SM1.1. Question wording of the 60 conspiracy theories and variable name*

| Variable       | Stats / Values                                                                                   | Variable             | Stats / Values                                                                                   |
|----------------|--------------------------------------------------------------------------------------------------|----------------------|--------------------------------------------------------------------------------------------------|
| rad_poison     | Mean (sd) : 3.9 (1.2)<br>min $\leq$ med $\leq$ max:<br>1 $\leq$ 4 $\leq$ 5<br>IQR (CV) : 2 (0.3) | epstein_murder       | Mean (sd) : 3.2 (1.3)<br>min $\leq$ med $\leq$ max:<br>1 $\leq$ 3 $\leq$ 5<br>IQR (CV) : 1 (0.4) |
| aids_cia       | Mean (sd) : 3.8 (1.3)<br>min $\leq$ med $\leq$ max:<br>1 $\leq$ 4 $\leq$ 5<br>IQR (CV) : 2 (0.3) | cia_conspiracy_label | Mean (sd) : 3.3 (1.2)<br>min $\leq$ med $\leq$ max:<br>1 $\leq$ 3 $\leq$ 5<br>IQR (CV) : 1 (0.4) |
| aids_cover     | Mean (sd) : 3.8 (1.3)<br>min $\leq$ med $\leq$ max:<br>1 $\leq$ 4 $\leq$ 5<br>IQR (CV) : 2 (0.3) | malcolm_x_gov        | Mean (sd) : 3.4 (1.2)<br>min $\leq$ med $\leq$ max:<br>1 $\leq$ 3 $\leq$ 5<br>IQR (CV) : 2 (0.4) |
| vaccine_autism | Mean (sd) : 3.6 (1.3)<br>min $\leq$ med $\leq$ max:<br>1 $\leq$ 4 $\leq$ 5<br>IQR (CV) : 2 (0.4) | liberty_lucifer      | Mean (sd) : 3.9 (1.2)<br>min $\leq$ med $\leq$ max:<br>1 $\leq$ 4 $\leq$ 5<br>IQR (CV) : 2 (0.3) |
| bee_dieoff     | Mean (sd) : 3.7 (1.3)<br>min $\leq$ med $\leq$ max:<br>1 $\leq$ 4 $\leq$ 5<br>IQR (CV) : 2 (0.4) | hitler_alive         | Mean (sd) : 4 (1.3)<br>min $\leq$ med $\leq$ max:<br>1 $\leq$ 5 $\leq$ 5<br>IQR (CV) : 2 (0.3)   |
| cancer_cure    | Mean (sd) : 3.5 (1.4)<br>min $\leq$ med $\leq$ max:<br>1 $\leq$ 4 $\leq$ 5<br>IQR (CV) : 3 (0.4) | nwo_group            | Mean (sd) : 3.5 (1.4)<br>min $\leq$ med $\leq$ max:<br>1 $\leq$ 3 $\leq$ 5<br>IQR (CV) : 3 (0.4) |
| covid_5g       | Mean (sd) : 4.1 (1.2)<br>min $\leq$ med $\leq$ max:<br>1 $\leq$ 5 $\leq$ 5                       | un_worldgov          | Mean (sd) : 3.7 (1.3)<br>min $\leq$ med $\leq$ max:<br>1 $\leq$ 4 $\leq$ 5                       |

|                 |                                                                              |                    |                                                                              |
|-----------------|------------------------------------------------------------------------------|--------------------|------------------------------------------------------------------------------|
|                 | IQR (CV) : 2 (0.3)                                                           |                    | IQR (CV) : 2 (0.4)                                                           |
| elf_mindcontrol | Mean (sd) : 3.6 (1.2)<br>min ≤ med ≤ max:<br>1 ≤ 4 ≤ 5<br>IQR (CV) : 2 (0.3) | alqaeda_falseflag  | Mean (sd) : 4 (1.3)<br>min ≤ med ≤ max:<br>1 ≤ 5 ≤ 5<br>IQR (CV) : 2 (0.3)   |
| covid_china     | Mean (sd) : 3.1 (1.4)<br>min ≤ med ≤ max:<br>1 ≤ 3 ≤ 5<br>IQR (CV) : 2 (0.4) | rothschild_control | Mean (sd) : 3.7 (1.3)<br>min ≤ med ≤ max:<br>1 ≤ 4 ≤ 5<br>IQR (CV) : 2 (0.3) |
| earthquake_bomb | Mean (sd) : 3.5 (1.3)<br>min ≤ med ≤ max:<br>1 ≤ 3 ≤ 5<br>IQR (CV) : 2 (0.4) | oil_tech_suppress  | Mean (sd) : 3 (1.3)<br>min ≤ med ≤ max:<br>1 ≤ 3 ≤ 5<br>IQR (CV) : 2 (0.4)   |
| moon_hoax       | Mean (sd) : 3.8 (1.3)<br>min ≤ med ≤ max:<br>1 ≤ 4 ≤ 5<br>IQR (CV) : 2 (0.3) | central_banks      | Mean (sd) : 3.2 (1.3)<br>min ≤ med ≤ max:<br>1 ≤ 3 ≤ 5<br>IQR (CV) : 2 (0.4) |
| climate_hoax    | Mean (sd) : 3.8 (1.3)<br>min ≤ med ≤ max:<br>1 ≤ 4 ≤ 5<br>IQR (CV) : 2 (0.3) | monsanto_gmo       | Mean (sd) : 3.5 (1.3)<br>min ≤ med ≤ max:<br>1 ≤ 3 ≤ 5<br>IQR (CV) : 2 (0.4) |
| earth_meltdown  | Mean (sd) : 3.6 (1.3)<br>min ≤ med ≤ max:<br>1 ≤ 4 ≤ 5<br>IQR (CV) : 2 (0.4) | ebola_bigpharma    | Mean (sd) : 3.6 (1.3)<br>min ≤ med ≤ max:<br>1 ≤ 4 ≤ 5<br>IQR (CV) : 2 (0.4) |
| hollow_earth    | Mean (sd) : 4.2 (1.1)<br>min ≤ med ≤ max:<br>1 ≤ 5 ≤ 5                       | jesus_fake         | Mean (sd) : 4 (1.2)<br>min ≤ med ≤ max:<br>1 ≤ 5 ≤ 5                         |

|                   |                                                                              |                    |                                                                              |
|-------------------|------------------------------------------------------------------------------|--------------------|------------------------------------------------------------------------------|
|                   | IQR (CV) : 2 (0.3)                                                           |                    | IQR (CV) : 2 (0.3)                                                           |
| flat_earth        | Mean (sd) : 3.9 (1.4)<br>min ≤ med ≤ max:<br>1 ≤ 5 ≤ 5<br>IQR (CV) : 2 (0.4) | muhammad_fake      | Mean (sd) : 3.6 (1.2)<br>min ≤ med ≤ max:<br>1 ≤ 4 ≤ 5<br>IQR (CV) : 2 (0.3) |
| cold_fusion_cover | Mean (sd) : 3.4 (1.2)<br>min ≤ med ≤ max:<br>1 ≤ 3 ≤ 5<br>IQR (CV) : 2 (0.4) | satanic_org        | Mean (sd) : 3.8 (1.3)<br>min ≤ med ≤ max:<br>1 ≤ 4 ≤ 5<br>IQR (CV) : 2 (0.3) |
| ufo_cover         | Mean (sd) : 3.2 (1.4)<br>min ≤ med ≤ max:<br>1 ≤ 3 ≤ 5<br>IQR (CV) : 3 (0.4) | masons_control     | Mean (sd) : 3.6 (1.3)<br>min ≤ med ≤ max:<br>1 ≤ 4 ≤ 5<br>IQR (CV) : 2 (0.4) |
| stargate_iraq     | Mean (sd) : 3.9 (1.2)<br>min ≤ med ≤ max:<br>1 ≤ 4 ≤ 5<br>IQR (CV) : 2 (0.3) | jews_control       | Mean (sd) : 3.8 (1.3)<br>min ≤ med ≤ max:<br>1 ≤ 4 ≤ 5<br>IQR (CV) : 2 (0.3) |
| alien_cover       | Mean (sd) : 3.2 (1.4)<br>min ≤ med ≤ max:<br>1 ≤ 3 ≤ 5<br>IQR (CV) : 2 (0.4) | monks_fake_history | Mean (sd) : 3.7 (1.2)<br>min ≤ med ≤ max:<br>1 ≤ 4 ≤ 5<br>IQR (CV) : 2 (0.3) |
| evolution_false   | Mean (sd) : 3.6 (1.3)<br>min ≤ med ≤ max:<br>1 ≤ 4 ≤ 5<br>IQR (CV) : 2 (0.4) | elvis_alive        | Mean (sd) : 4.3 (1.1)<br>min ≤ med ≤ max:<br>1 ≤ 5 ≤ 5<br>IQR (CV) : 1 (0.3) |
| cern_hell         | Mean (sd) : 4 (1.2)<br>min ≤ med ≤ max:<br>1 ≤ 5 ≤ 5                         | marley_cia         | Mean (sd) : 3.8 (1.2)<br>min ≤ med ≤ max:<br>1 ≤ 4 ≤ 5                       |



|                   |                                                                              |                    |                                                                              |
|-------------------|------------------------------------------------------------------------------|--------------------|------------------------------------------------------------------------------|
|                   | IQR (CV) : 2 (0.3)                                                           |                    | IQR (CV) : 2 (0.3)                                                           |
| chemtrails        | Mean (sd) : 3.8 (1.2)<br>min ≤ med ≤ max:<br>1 ≤ 4 ≤ 5<br>IQR (CV) : 2 (0.3) | diana_queen        | Mean (sd) : 3.8 (1.3)<br>min ≤ med ≤ max:<br>1 ≤ 4 ≤ 5<br>IQR (CV) : 2 (0.4) |
| 911_gov           | Mean (sd) : 3.8 (1.4)<br>min ≤ med ≤ max:<br>1 ≤ 4 ≤ 5<br>IQR (CV) : 2 (0.4) | sports_staged      | Mean (sd) : 4.1 (1.2)<br>min ≤ med ≤ max:<br>1 ≤ 5 ≤ 5<br>IQR (CV) : 2 (0.3) |
| 911_energy_weapon | Mean (sd) : 3.9 (1.3)<br>min ≤ med ≤ max:<br>1 ≤ 4 ≤ 5<br>IQR (CV) : 2 (0.3) | goy_cabal          | Mean (sd) : 3.8 (1.2)<br>min ≤ med ≤ max:<br>1 ≤ 4 ≤ 5<br>IQR (CV) : 2 (0.3) |
| wtc7_det          | Mean (sd) : 3.6 (1.4)<br>min ≤ med ≤ max:<br>1 ≤ 4 ≤ 5<br>IQR (CV) : 2 (0.4) | kubrick_illuminati | Mean (sd) : 3.7 (1.2)<br>min ≤ med ≤ max:<br>1 ≤ 4 ≤ 5<br>IQR (CV) : 2 (0.3) |
| swineflu_terror   | Mean (sd) : 3.9 (1.2)<br>min ≤ med ≤ max:<br>1 ≤ 4 ≤ 5<br>IQR (CV) : 2 (0.3) | titanic_olympic    | Mean (sd) : 4.1 (1.2)<br>min ≤ med ≤ max:<br>1 ≤ 5 ≤ 5<br>IQR (CV) : 2 (0.3) |
| hebdo_staged      | Mean (sd) : 3.9 (1.2)<br>min ≤ med ≤ max:<br>1 ≤ 4 ≤ 5<br>IQR (CV) : 2 (0.3) | prison_racism      | Mean (sd) : 3.6 (1.2)<br>min ≤ med ≤ max:<br>1 ≤ 4 ≤ 5<br>IQR (CV) : 2 (0.3) |
| paris_bomb_staged | Mean (sd) : 4 (1.2)<br>min ≤ med ≤ max:<br>1 ≤ 4 ≤ 5                         | slavery_choice     | Mean (sd) : 4 (1.2)<br>min ≤ med ≤ max:<br>1 ≤ 5 ≤ 5                         |

|                 |                       |                 |                     |
|-----------------|-----------------------|-----------------|---------------------|
|                 | IQR (CV) : 2 (0.3)    |                 | IQR (CV) : 2 (0.3)  |
| 911_forewarned  | Mean (sd) : 3.5 (1.3) | conspiracy_fake | Mean (sd) : 3 (1.3) |
|                 | min ≤ med ≤ max:      |                 | min ≤ med ≤ max:    |
|                 | 1 ≤ 4 ≤ 5             |                 | 1 ≤ 3 ≤ 5           |
|                 | IQR (CV) : 2 (0.4)    |                 | IQR (CV) : 2 (0.4)  |
| sharia_law_west | Mean (sd) : 3 (1.3)   | lefthand_secret | Mean (sd) : 4 (1.2) |
|                 | min ≤ med ≤ max:      |                 | min ≤ med ≤ max:    |
|                 | 1 ≤ 3 ≤ 5             |                 | 1 ≤ 4 ≤ 5           |
|                 | IQR (CV) : 2 (0.5)    |                 | IQR (CV) : 2 (0.3)  |

---

*Table SM1.2. Descriptive statistics of the 60 conspiracy theories (in grey, the items of the final scale)*

## Supplemental material 2 - Principal component analysis

| Measure                                | 45 items | 8 items (pilot) | 8 items (final ds) |
|----------------------------------------|----------|-----------------|--------------------|
| SS Loadings (1st Component)            | 21.65    | 5.21            | 5.57               |
| Proportion of Variance (1st Component) | 0.48     | 0.65            | 0.7                |
| Cumulative Proportion (1st Component)  | 0.48     | 0.65            | 0.7                |
| Total Components                       | 45       | 8               | 8                  |
| Mean Complexity                        | 4.1      | 2.07            | 1.9                |

*Table SM2.1. PCA on 1) 45 items 2) 8 items (pilot study), 3) 8 items (final study), showing a single latent variable*

| Country | Values - Pilot | Values - Final ds |
|---------|----------------|-------------------|
| USA     | 0.912          | 0.937             |
| UK      | 0.940          | 0.936             |
| ITA     | 0.901          | 0.931             |
| FRA     | 0.91           | 0.943             |
| GER     | 0.951          | 0.927             |
| SPA     | 0.878          | 0.932             |
| SWE     | 0.946          | 0.942             |
| POL     | 0.899          | 0.941             |
| All     | 0.923          | 0.937             |

*Table SM2.2. Cronbach's Alpha (pilot study and Final dataset)*

### Supplemental material 3 - Comparative conspiracy beliefs and mentality scales

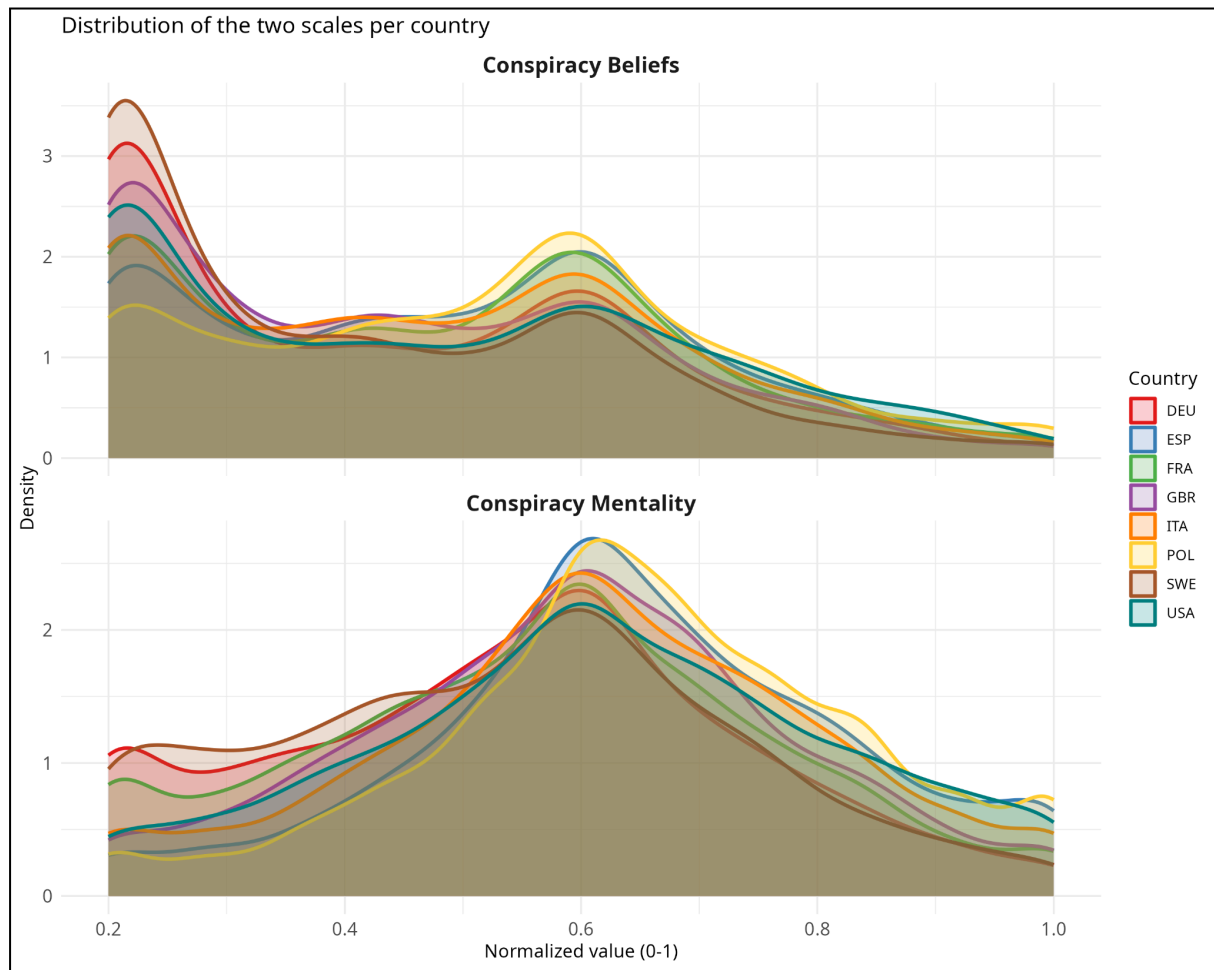

*Figure SM3.1. Kernel density distributions of the comparative conspiracy belief and mentality scales*

## Supplemental material 4 - Fit statistics for the models

| Measure               | Value - 60 CT | Values - 8 item<br>(pilot) | Values - 8 items<br>(final ds) |
|-----------------------|---------------|----------------------------|--------------------------------|
| npar                  | 135           | 24                         | 16                             |
| fmin                  | 0.675         | 0.003                      | 0.013                          |
| chisq                 | 2,160.38      | 8.722                      | 506.591                        |
| df                    | 945           | 20                         | 20                             |
| pvalue                | 0             | 0.986                      | 0                              |
| baseline.chisq        | 17,181.21     | 2,140.09                   | 115,148.80                     |
| baseline.df           | 990           | 28                         | 28                             |
| baseline.pvalue       | 0             | 0                          | 0                              |
| cfi                   | 0.925         | 1                          | 0.996                          |
| tli                   | 0.921         | 1.007                      | 0.994                          |
| nnfi                  | 0.921         | 1.007                      | 0.994                          |
| rfi                   | 0.868         | 0.994                      | 0.994                          |
| nfi                   | 0.874         | 0.996                      | 0.996                          |
| pnfi                  | 0.835         | 0.711                      | 0.711                          |
| ifi                   | 0.925         | 1.005                      | 0.996                          |
| rni                   | 0.925         | 1.005                      | 0.996                          |
| logl                  | -42,624.52    | -7,800.04                  | -208,711.70                    |
| unrestricted.logl     | -41,544.33    | -7,795.68                  | -208,458.40                    |
| aic                   | 85,519.04     | 15,648.08                  | 417,455.40                     |
| bic                   | 86,245.12     | 15,777.03                  | 417,581.90                     |
| ntotal                | 1,601         | 1,592                      | 20,051                         |
| bic2                  | 85,816.25     | 15,700.78                  | 417,531.00                     |
| rmsea                 | 0.028         | 0                          | 0.035                          |
| rmsea.ci.lower        | 0.027         | 0                          | 0.032                          |
| rmsea.ci.upper        | 0.03          | 0                          | 0.037                          |
| rmsea.ci.level        | 0.9           | 0.9                        | 0.9                            |
| rmsea.pvalue          | 1             | 1                          | 1                              |
| rmsea.close.h0        | 0.05          | 0.05                       | 0.05                           |
| rmsea.notclose.pvalue | 0             | 0                          | 0                              |
| rmsea.notclose.h0     | 0.08          | 0.08                       | 0.08                           |
| rmr                   | 0.082         | 0.021                      | 0.015                          |

|                     |         |          |          |
|---------------------|---------|----------|----------|
| rmr_nomean          | 0.084   | 0.023    | 0.015    |
| srnr                | 0.049   | 0.013    | 0.009    |
| srnr_bentler        | 0.049   | 0.013    | 0.009    |
| srnr_bentler_nomean | 0.05    | 0.014    | 0.009    |
| crnr                | 0.05    | 0.014    | 0.011    |
| crnr_nomean         | 0.051   | 0.016    | 0.011    |
| srnr_mplus          | 0.049   | 0.013    | 0.009    |
| srnr_mplus_nomean   | 0.05    | 0.014    | 0.009    |
| cn_05               | 755.136 | 5,734.11 | 1,244.23 |
| cn_01               | 778.435 | 6,857.68 | 1,487.88 |
| gfi                 | 0.921   | 0.997    | 0.994    |
| agfi                | 0.91    | 0.993    | 0.988    |
| pgfi                | 0.806   | 0.453    | 0.552    |
| mfi                 | 0.684   | 1.004    | 0.988    |
| ecvi                | 1.518   | 0.036    | 0.027    |

---

*Table SM4.1. Fit statistics for all the SEM models*

# Supplemental material 5 - Additional check - invariance for the mentality scale

| <i>GCB-5 scale</i>                     |       |                        |         |          |        |                  |
|----------------------------------------|-------|------------------------|---------|----------|--------|------------------|
| Chi <sup>2</sup> and model fit indices |       |                        |         |          |        |                  |
|                                        | DF    | AIC                    | BIC     | RMSEA    | CFI    | Chi <sup>2</sup> |
| Configural fit                         | 40    | 297668                 | 298617  | .032     | .007   | 142.69           |
| Metric fit                             | 68    | 297729                 | 298457  | .034     | .994   | 260.28           |
| Scalar fit                             | 96    | 298591                 | 200097  | .067     | .965   | 1177.44          |
| Chi2 and model fit differences         |       |                        |         |          |        |                  |
|                                        | DF d. | Chi <sup>2</sup> diff. | P-value | RMSEA d. | CFI d. |                  |
| Metric - configural                    | 28    | 117.59                 | 0.000   | 0.002    | -0.003 |                  |
| Scalar - metric                        | 28    | 917.15                 | 0.000   | 0.033    | -0.028 |                  |

*Table SM5.1. Configural, metric, and scalar fit for the multigroup model - GCB-5 scale*

## Supplemental material 6 - Full item wordings employed in the validity analysis

| Construct                                     | Items                                                                                                                                                                      | Scale |
|-----------------------------------------------|----------------------------------------------------------------------------------------------------------------------------------------------------------------------------|-------|
| <i>Conspiracy<br/>Mentality</i>               | [How much do you agree with the following statements?] States allow or commit acts of terrorism on their own soil, concealing their involvement.                           | 1-5   |
|                                               | [...] Evidence of contact with aliens is hidden from the public.                                                                                                           |       |
|                                               | [...] Many advanced technologies that would damage today's big industry are hidden.                                                                                        |       |
|                                               | [...] Some significant events in history have been the result of the activities of a small group that secretly manipulates world events.                                   |       |
|                                               | [...] There are experiments involving new drugs or technologies being conducted on citizens without their knowledge or consent.                                            |       |
| <i>Populist<br/>Attitudes</i>                 | [How much do you agree with the following statements?] Politicians in Parliament must follow the will of the people.                                                       | 1-5   |
|                                               | [...] The people, and not politicians, should make our most important policy decisions.                                                                                    |       |
|                                               | [...] I would rather be represented by a citizen than by a specialized politician                                                                                          |       |
|                                               | [...] Elected officials talk too much and take too little action.                                                                                                          |       |
|                                               | [...] What people call 'compromise' in politics is really just selling out on one's principles                                                                             |       |
| <i>Perceived<br/>Victimhood</i>               | [...] Journalists are too much in touch with the strong powers to inform ordinary people correctly                                                                         | 1-5   |
|                                               | [How much do you agree with the following statements?] The system works against people like me                                                                             |       |
|                                               | [...] The world is 'doing it' to me and there's nothing I can do about it                                                                                                  |       |
|                                               | [...] The world is out to get me                                                                                                                                           |       |
|                                               | [...] The system is rigged to benefit a select few                                                                                                                         |       |
|                                               | [...] I rarely get what I deserve in life                                                                                                                                  |       |
|                                               | [...] Great things never come to me                                                                                                                                        |       |
|                                               | [...] I never seem to get an extra break                                                                                                                                   |       |
| <i>Support for<br/>Political<br/>Violence</i> | [...] I usually have to settle for less                                                                                                                                    | 1-7   |
|                                               | [In extreme circumstances, how acceptable is it for someone in your community to do one of the following to express their political discontent?] Hurting a public official |       |
|                                               | [...] Protest violently                                                                                                                                                    |       |



|                            |                                                                                                                                                          |                                                |
|----------------------------|----------------------------------------------------------------------------------------------------------------------------------------------------------|------------------------------------------------|
|                            | [...] Destroying other people's property                                                                                                                 |                                                |
|                            | [...] Publicly propagating the boycott of an election                                                                                                    |                                                |
|                            | [...] Inciting violence                                                                                                                                  |                                                |
|                            | [...] Arming oneself and isolating oneself from society                                                                                                  |                                                |
| <i>Institutional Trust</i> | [Please tell me how much you personally trust each of the institutions:]<br>The national Parliament                                                      |                                                |
|                            | [...] The regional and local institutions                                                                                                                |                                                |
|                            | [...] The police                                                                                                                                         |                                                |
|                            | [...] The Healthcare system                                                                                                                              |                                                |
|                            | [...] The judicial system                                                                                                                                | 0-10                                           |
|                            | [...] The European Union                                                                                                                                 |                                                |
|                            | [...] Scientists                                                                                                                                         |                                                |
|                            | [...] The Church                                                                                                                                         |                                                |
|                            | [...] The UN                                                                                                                                             |                                                |
| <i>Horizontal Trust</i>    | Generally speaking, would you say that most people can be trusted, or that you can't be too careful in dealing with people?                              | 0-10                                           |
| <i>Political Interest</i>  | In general, how interested are you in politics?                                                                                                          | 1-4                                            |
| <i>CRT</i>                 | If 5 machines take 5 minutes to produce 5 gadgets, how long will it take 100 machines to produce 100 gadgets?                                            |                                                |
|                            | The water lilies in a pond double in number every day. If it takes 48 days to cover the pond completely, how many days will it take to cover half of it? | numeric;<br>each item<br>converted as<br>dummy |
|                            | A bat and a ball cost a total of 1.10 \$. The bat costs 1.00 \$ more than the ball. How much does the ball cost?                                         |                                                |
| <i>Left-right</i>          | In politics people sometimes talk of 'left' and 'right'. Where would you place yourself?                                                                 | 0-10                                           |

*Table SM6.1. Comparative variables*

| Construct                          | Items                                                                                                                                            | Scale |
|------------------------------------|--------------------------------------------------------------------------------------------------------------------------------------------------|-------|
| <i>Internal Locus of Control</i>   | [The following statements may apply more or less to you. To what extent do you think each statement applies to you personally?] I'm my own boss. | 1-5   |
|                                    | [...] If I work hard, I will succeed.                                                                                                            |       |
| <i>External Locus of Control</i>   | [...] Whether at work or in my private life: What I do is mainly determined by others.                                                           | 1-5   |
|                                    | [...] Fate often gets in the way of my plans                                                                                                     |       |
| <i>Paranormal Beliefs</i>          | [How much do you agree with the following statements?] Black cats can bring bad luck.                                                            | 1-5   |
|                                    | [...] Your mind or soul can leave your body and travel (astral projection).                                                                      |       |
|                                    | [...] Astrology is a way to accurately predict the future.                                                                                       |       |
|                                    | [...] If you break a mirror, you will have bad luck.                                                                                             |       |
|                                    | [...] During altered states, such as sleep or trances, the spirit can leave the body.                                                            |       |
|                                    | [...] The horoscope accurately tells a person's future.                                                                                          |       |
|                                    | [...] The number '13' is unlucky.                                                                                                                |       |
|                                    | [...] Reincarnation does occur.                                                                                                                  |       |
|                                    | [...] Some psychics can accurately predict the future.                                                                                           |       |
|                                    | [...] It is possible to communicate with the dead.                                                                                               |       |
| <i>Feeling Thermometers</i>        | [We'd like to know your feelings toward some political leaders and public figures. Please rate each item on a scale from 0 to 100:] Elon Musk    | 0-100 |
|                                    | [...] Capitol Hill rioters                                                                                                                       |       |
|                                    | [...] Alex Jones                                                                                                                                 |       |
|                                    | [...] Luigi Mangione                                                                                                                             |       |
|                                    | [...] Antifa                                                                                                                                     |       |
|                                    | [...] Proud Boys                                                                                                                                 |       |
|                                    | [...] Muslims                                                                                                                                    |       |
|                                    | [...] Jews                                                                                                                                       |       |
| <i>Beliefs in Divine Immanence</i> | [...] How much do you agree with the following statements? Miraculous healings do exist                                                          | 1-5   |
|                                    | [...] God intervenes directly in our lives                                                                                                       |       |

|                            |                                                                                                                   |      |
|----------------------------|-------------------------------------------------------------------------------------------------------------------|------|
|                            | [...] Prayer can heal physical illness                                                                            |      |
| <i>Depression</i>          | [Over the last two weeks, how often have you been bothered by:] Feeling down, depressed, or hopeless?             | 1-4  |
|                            | [...] Having little interest or pleasure in doing things?                                                         |      |
| <i>Anti-elitism</i>        | [How much do you agree with the following statements?]<br>Elected politicians sellout to various interests groups | 1-5  |
|                            | [...] High level public officials seek power for its own sake                                                     |      |
|                            | [...] Those at the top use their power to become better off at the expense of ordinary people                     |      |
|                            | [...] Politicians do not want to improve the lives of ordinary people                                             |      |
|                            | [...] A few powerful individuals deliberately prevent our country from making progress                            |      |
| <i>Religious Beliefs</i>   | [Do you believe in:] Life after death                                                                             | 1-4  |
|                            | [...] Heaven                                                                                                      |      |
|                            | [...] Hell                                                                                                        |      |
|                            | [...] Religious miracles                                                                                          |      |
|                            | [...] The supernatural powers of deceased ancestors                                                               |      |
| <i>Institutional Trust</i> | [Please tell me how much you personally trust each of the institutions:]<br>The Congress                          | 0-10 |
|                            | [...] The Federal Government                                                                                      |      |
|                            | [...] The Supreme Court                                                                                           |      |
|                            | [...] The State government                                                                                        |      |
|                            | [...] The news media                                                                                              |      |
|                            | [...] The President of the USA                                                                                    |      |
|                            | [...] Scientists                                                                                                  |      |
|                            | [...] The police                                                                                                  |      |
|                            | [...] The UN                                                                                                      |      |

*Table SM6.2. US-specific variables*
